# Supplementary material for: Association of centenarian polygenic score with disability-free survival and its modification effects on aging outcomes
Source: Research Square preprint supplement (doi:10.21203/rs.3.rs-6869504/v1), 2025-06-26
Supplement: Supplementary file 1 [file 0af0dc16d4bb1b68c7e2ec5b.pdf]

## Controls (Cont)

## Healthy Aged (HA)

## Centenarians (Cent)

Concepts of cohort: Population based adult cohort  
Three-generation community cohort

Healthy longevity

Exceptional longevity

Number of samples at entry:

n=30,081

n=1,026

n=1,027

gDNA sequence  
determination

WGS  
n=3,340

Array-imputation  
n=26,741

Array-imputation

Disagree for  
gDNA seq.: -2  
n=1,024

WGS  
n=526

Array-imputation

n=441

n=60

filter

GWAS (WGS)

n=3,340

PI\_HAT:-11,519  
n=15,222 → (n=10,000)

PI\_HAT:-8

PI\_HAT:-1  
mismatch  
sex info:-1  
n=524

PI\_HAT:-1  
n=440

GWAS (Array-imp.)

(n=5,222)  
Lack of phenotype: -1,247  
PCA outlier: -9  
n=3,966

Number of samples  
for analysis:

n=7,306  
(GWAS)

n=10,000  
(PRS)

n=1,016  
(PRS)

n=964  
(PRS, GWAS)

n=60  
(PGS replication)

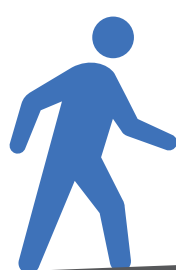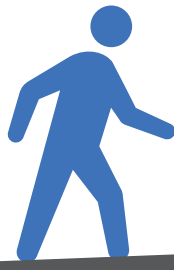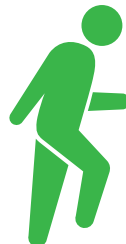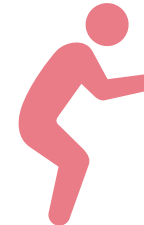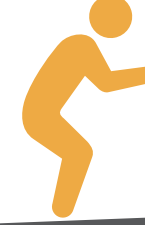

age

Age at entry (yo)  
Median (IQR)

36  
(30-58)

45  
(32-63)

86.8  
(85.9-88.2)

106.0  
(103.9-107.1)

100.6  
(100.3-100.9)

Women (n(%))

4,728 (64.7)

6,188 (61.9)

503 (49.5)

820 (85.1)

42 (70.0)
