# Supplementary material for: Association of centenarian polygenic score with disability-free survival and its modification effects on aging outcomes
Source: Research Square preprint supplement (doi:10.21203/rs.3.rs-6869504/v1), 2025-06-26
Supplement: Supplementary file 1 [file 16ab5058ee234683b87ba287.xlsx]

## Sheet: Supplementary Table 4
	Supplementary Table 4 | Standardized and lsmean Z-score for Control, Healthy Ager, and Centenarian calculated by 62 Japanese GWAS summary statistics and CentPGS.
	category		phenotype (Abb)		Controls (Cont., n=10,000)							Healthy Agers (HA, n=1,016)							Contenarians (Cent., n=964)							p-value (p-value < 0.00079: sig. (q-value))
					n (total)	n (female)	mean	SD	adj. Z-score (95%CI)			n (total)	n (female)	mean	SD	adj. Z-score (95%CI)				n (female)	mean	SD	adj. Z-score (95%CI)			Cont. VS Cent.	Cont. VS HA	HA VS Cent.
1	disease	ND	Alzheimer disease	AD	10000	6967	0	1	0.003524	(-0.018 - 0.025)		1016	503	-0.0003	1.0044	-0.000406	(-0.062 - 0.061)		964	820	0.0557	1.029	0.061968	(-0.003 - 0.127)		0.0852652	0.905965	0.173576
2	disease	Cardiovascular	Congestive heart failure	CHF	10000	6967	0	1	0.004788	(-0.016 - 0.026)		1016	503	-0.1123	0.9737	-0.112388	(-0.174 - -0.051)		964	820	-0.1171	0.9781	-0.108597	(-0.173 - -0.044)		0.000777803	0.000392428	0.960659
3	disease	Cardiovascular	Peripheral artery disease	PAD	10000	6967	0	1	-0.005834	(-0.027 - 0.015)		1016	503	-0.0054	1.0053	-0.005213	(-0.067 - 0.056)		964	820	-0.0729	1.0196	-0.08332	(-0.148 - -0.019)		0.0224179	0.985092	0.145708
4	disease	Cardiovascular	Ischemic stroke	IS	10000	6967	0	1	-0.002333	(-0.023 - 0.019)		1016	503	-0.0467	0.9879	-0.046625	(-0.108 - 0.015)		964	820	-0.1072	1.0474	-0.111396	(-0.176 - -0.047)		0.00132559	0.183144	0.160806
5	disease	Cardiovascular	Arrhythmia	Arrhythmia	10000	6967	0	1	0.001127	(-0.020 - 0.022)		1016	503	-0.0778	0.9663	-0.077867	(-0.139 - -0.017)		964	820	-0.1338	0.9813	-0.131776	(-0.196 - -0.067)		8.15149e-05	0.0168028	0.453795
6	disease	Immune	Atopic dermatitis	Atopy	10000	6967	0	1	0.002464	(-0.019 - 0.024)		1016	503	0.0851	0.9927	0.085026	(0.023 - 0.147)		964	820	0.0944	1.0637	0.098793	(0.0340 - 0.164)		0.00464532	0.0132602	0.784917
7	disease	Immune	Asthma	Asthma	10000	6967	0	1	0.00351	(-0.018 - 0.025)		1016	503	-0.1375	1.0671	-0.137618	(-0.200 - -0.076)		964	820	-0.0288	1.0097	-0.022526	(-0.088 - 0.043)		0.445036	>0.0001	0.012317
8	disease	Immune	Rheumatoid arthritis	RA	10000	6967	0	1	-0.000181	(-0.022 - 0.021)		1016	503	-0.0467	1.1163	-0.046656	(-0.109 - 0.016)		964	820	-0.0386	1.0476	-0.038904	(-0.104 - 0.027)		0.25962	0.167257	0.688462
9	disease	Cancer	Gastric cancer	GaCa	10000	6967	0	1	0.005854	(-0.015 - 0.027)		1016	503	0.0748	1.0432	0.074626	(0.013 - 0.136)		964	820	0.0619	1.0031	0.072382	(0.008 - 0.137)		0.0503916	0.0389519	0.784882
10	disease	Cancer	Colorectal cancer	CoCa	10000	6967	0	1	-0.012905	(-0.034 - 0.008)		1016	503	0.0295	1.024	0.029861	(-0.032 - 0.091)		964	820	0.0451	0.9739	0.02212	(-0.042 - 0.087)		0.300837	0.197193	0.396681
11	disease	Other	Type 2 diabetes	T2D	10000	6967	0	1	-0.010946	(-0.032 - 0.010)		1016	503	-0.0685	1.021	-0.068273	(-0.130 - -0.007)		964	820	-0.2111	0.9924	-0.23058	(-0.295 - -0.166)		>0.0001	0.0842918	0.00338416
12	disease	Other	Glaucoma	Glaucoma	10000	6967	0	1	-0.003057	(-0.024 - 0.018)		1016	503	0.0614	0.9947	0.061491	(0.000 - 0.123)		964	820	0.0744	0.9946	0.068914	(0.004 - 0.133)		0.033436	0.0515135	0.365391
13	disease	Other	Chronic obstructive pulmonary disease	COPD	10000	6967	0	1	0.00072	(-0.020 - 0.022)		1016	503	0.0813	1.0155	0.081285	(0.020 - 0.143)		964	820	0.0817	0.9654	0.082982	(0.018 - 0.148)		0.0150132	0.0150393	0.865149
14	quantitative		Body mass index	BMI	10000	6967	0	1	-0.001151	(-0.022 - 0.020)		1016	503	-0.0812	0.9983	-0.081131	(-0.143 - -0.020)		964	820	-0.0996	0.9844	-0.101675	(-0.166 - -0.037)		0.00296116	0.0157894	0.637243
15	quantitative	Blood Pressure	Systolic blood pressure	SBP	10000	6967	0	1	-0.005508	(-0.027 - 0.015)		1016	503	-0.1268	0.9891	-0.126703	(-0.188 - -0.065)		964	820	-0.2686	0.9665	-0.278403	(-0.343 - -0.214)		>0.0001	0.000247012	0.00218735
16	quantitative	Blood Pressure	Diastolic blood pressure	DBP	10000	6967	0	1	-0.001883	(-0.023 - 0.019)		1016	503	-0.1184	1.0072	-0.118315	(-0.180 - -0.057)		964	820	-0.2372	1.0382	-0.240523	(-0.305 - -0.176)		>0.0001	0.000473149	0.0300752
17	quantitative	Blood Pressure	Pulse pressure	PP	10000	6967	0	1	-0.00446	(-0.025 - 0.017)		1016	503	-0.1117	0.9811	-0.111567	(-0.173 - -0.050)		964	820	-0.2146	0.9892	-0.222583	(-0.287 - -0.158)		>0.0001	0.00121317	0.0410977
18	quantitative	Blood Pressure	Mean arterial pressure	MAP	10000	6967	0	1	-0.004424	(-0.025 - 0.017)		1016	503	-0.1583	1.0014	-0.1582	(-0.220 - -0.097)		964	820	-0.2464	1.0006	-0.254265	(-0.319 - -0.190)		>0.0001	>0.0001	0.0614986
19	quantitative	Lipid & Glyco metabolism	Total cholesterol	TC	10000	6967	0	1	0.002296	(-0.019 - 0.023)		1016	503	-0.0279	1.0012	-0.027982	(-0.089 - 0.033)		964	820	-0.1246	0.9682	-0.120544	(-0.185 - -0.056)		0.000278068	0.36028	0.0207514
20	quantitative	Lipid & Glyco metabolism	High-density-lipoprotein cholesterol	HDLC	10000	6967	0	1	-0.00677	(-0.028 - 0.014)		1016	503	-0.0783	0.9935	-0.078147	(-0.140 - -0.017)		964	820	0.0099	0.985	-0.002173	(-0.067 - 0.062)		0.891831	0.0311458	0.272948
21	quantitative	Lipid & Glyco metabolism	Low-density-lipoprotein cholesterol	LDLC	10000	6967	0	1	0.003701	(-0.017 - 0.025)		1016	503	0.0066	1.0133	0.006532	(-0.055 - 0.068)		964	820	-0.0506	0.9791	-0.043987	(-0.109 - 0.021)		0.158889	0.931953	0.37256
22	quantitative	Lipid & Glyco metabolism	Triglyceride	TG	10000	6967	0	1	0.001461	(-0.020 - 0.022)		1016	503	-0.0368	0.9985	-0.036805	(-0.098 - 0.025)		964	820	-0.0866	0.976	-0.083963	(-0.148 - -0.019)		0.0114993	0.247793	0.493584
23	quantitative	Lipid & Glyco metabolism	Blood sugar	BS	10000	6967	0	1	-0.004617	(-0.026 - 0.016)		1016	503	-0.0677	1.0089	-0.067632	(-0.129 - -0.006)		964	820	-0.1759	1.0121	-0.184138	(-0.249 - -0.119)		>0.0001	0.0579548	0.0242254
24	quantitative	Lipid & Glyco metabolism	Hemoglobin A1c	HbA1c	10000	6967	0	1	-0.000943	(-0.022 - 0.020)		1016	503	0.0074	1.0262	0.007463	(-0.054 - 0.069)		964	820	-0.0278	0.9765	-0.029446	(-0.094 - 0.035)		0.4002	0.800053	0.566302
25	quantitative	Plasma Protein	Total protein	TP	10000	6967	0	1	-0.007087	(-0.028 - 0.014)		1016	503	-0.0278	0.9861	-0.027589	(-0.089 - 0.034)		964	820	-0.0155	1.0095	-0.028101	(-0.093 - 0.036)		0.534732	0.536386	0.937859
26	quantitative	Plasma Protein	Albumin	Alb	10000	6967	0	1	-0.00251	(-0.024 - 0.018)		1016	503	0.0349	0.9582	0.034997	(-0.026 - 0.096)		964	820	0.0491	0.9987	0.044643	(-0.020 - 0.109)		0.162336	0.25656	0.731675
27	quantitative	Plasma Protein	Non-albumin protein	NAP	10000	6967	0	1	-0.006117	(-0.027 - 0.015)		1016	503	-0.0027	0.9753	-0.002506	(-0.064 - 0.059)		964	820	-0.034	1.0202	-0.044876	(-0.109 - 0.020)		0.252205	0.913298	0.609416
28	quantitative	Plasma Protein	Albumin/globulin ratio	A/G	10000	6967	0	1	-0.00167	(-0.023 - 0.019)		1016	503	0.0257	0.9843	0.025769	(-0.036 - 0.087)		964	820	0.0276	1.0145	0.024586	(-0.040 - 0.089)		0.438125	0.408156	0.734733
29	quantitative	Renal function	Blood urea nitrogen	BUN	10000	6967	0	1	0.00442	(-0.017 - 0.025)		1016	503	0.0726	0.9704	0.072528	(0.011 - 0.134)		964	820	0.0291	1.0157	0.036984	(-0.028 - 0.102)		0.335692	0.0398536	0.475067
30	quantitative	Renal function	Serum creatinine	sCr	10000	6967	0	1	-0.003412	(-0.024 - 0.018)		1016	503	0.0337	1.0129	0.033771	(-0.028 - 0.095)		964	820	0.0396	0.9931	0.033528	(-0.031 - 0.098)		0.275664	0.262655	0.859606
31	quantitative	Renal function	Estimated glomerular filtration rate	eGFR	10000	6967	0	1	-0.000253	(-0.021 - 0.021)		1016	503	-0.0324	1.0373	-0.032423	(-0.094 - 0.029)		964	820	0.0029	1.0201	0.002417	(-0.063 - 0.067)		0.937476	0.334569	0.637468
32	quantitative	Renal function	Uric acid	UA	10000	6967	0	1	-0.003917	(-0.025 - 0.017)		1016	503	-0.0468	0.964	-0.046743	(-0.108 - 0.015)		964	820	-0.0926	1.0688	-0.099601	(-0.164 - -0.035)		0.00484417	0.197982	0.164465
33	quantitative	Plasma Ion	Sodium ion	Na	10000	6967	0	1	0.00544	(-0.016 - 0.026)		1016	503	0.0753	0.9843	0.075209	(0.014 - 0.137)		964	820	0.1021	1.0085	0.111759	(0.047 - 0.176)		0.00168437	0.0353581	0.956369
34	quantitative	Plasma Ion	Potassium ion	K	10000	6967	0	1	0.005301	(-0.016 - 0.026)		1016	503	0.1071	1.0074	0.106952	(0.045 - 0.169)		964	820	0.0865	1.0215	0.095903	(0.031 - 0.161)		0.00761562	0.00224101	0.970191
35	quantitative	Plasma Ion	Chloride ion	Cl	10000	6967	0	1	0.007297	(-0.014 - 0.028)		1016	503	-0.0553	1.0216	-0.055531	(-0.117 - 0.006)		964	820	-0.0024	0.993	0.010647	(-0.054 - 0.075)		0.921298	0.0585664	0.0393156
36	quantitative	Plasma Ion	Calcium ion	Ca	10000	6967	0	1	-0.007887	(-0.029 - 0.013)		1016	503	-0.0109	0.9826	-0.010683	(-0.072 - 0.051)		964	820	-0.0728	0.9882	-0.086904	(-0.151 - -0.022)		0.0193422	0.932669	0.0714154
37	quantitative	Plasma Ion	Phosphorus ion	P	10000	6967	0	1	-0.000642	(-0.022 - 0.020)		1016	503	0.0257	0.9869	0.025763	(-0.036 - 0.087)		964	820	0.0568	0.985	0.055648	(-0.009 - 0.120)		0.0957503	0.425039	0.274147
38	quantitative	Liver function	Total bilirubin	TBil	10000	6967	0	1	0.000217	(-0.021 - 0.021)		1016	503	0.0264	0.9969	0.026406	(-0.035 - 0.088)		964	820	0.026	1.0053	0.026361	(-0.038 - 0.091)		0.440225	0.429966	0.709645
39	quantitative	Liver function	Zinc sulfate turbidity test	ZTT	10000	6967	0	1	-0.004865	(-0.026 - 0.016)		1016	503	-0.0589	0.9507	-0.058757	(-0.120 - 0.003)		964	820	-0.0974	1.0516	-0.106082	(-0.171 - -0.041)		0.00281055	0.104356	0.338105
40	quantitative	Liver function	Aspartate aminotransferase	AST	10000	6967	0	1	-0.004292	(-0.025 - 0.017)		1016	503	-0.1083	1.0156	-0.108199	(-0.170 - -0.047)		964	820	-0.1805	1.0198	-0.188164	(-0.253 - -0.123)		>0.0001	0.0017947	0.0852374
41	quantitative	Liver function	Alanine aminotransferase	ALT	10000	6967	0	1	-0.004315	(-0.025 - 0.017)		1016	503	-0.1298	1.0096	-0.129687	(-0.191 - -0.068)		964	820	-0.1395	0.9845	-0.147165	(-0.212 - -0.083)		>0.0001	0.000157124	0.808471
42	quantitative	Liver function	Alkaline phosphatase	ALP	10000	6967	0	1	0.003782	(-0.017 - 0.025)		1016	503	0.0043	1.0246	0.004185	(-0.058 - 0.066)		964	820	-0.0025	1.0404	0.004214	(-0.061 - 0.069)		0.989895	0.990375	0.852607
43	quantitative	Liver function	gamma-glutamyl transferase	GGT	10000	6967	0	1	-0.005113	(-0.026 - 0.016)		1016	503	-0.1371	0.9977	-0.136978	(-0.198 - -0.075)		964	820	-0.1463	1.0026	-0.155409	(-0.22 - -0.091)		>0.0001	7.08212e-05	0.389119
44	quantitative	Blood Coagulation etc.	Activated partial thromboplastin time	APTT	10000	6967	0	1	0.001482	(-0.020 - 0.023)		1016	503	0.0032	1.001	0.00321	(-0.059 - 0.065)		964	820	-0.0336	1.0485	-0.030959	(-0.096 - 0.034)		0.34009	0.95862	0.822374
45	quantitative	Blood Coagulation etc.	Prothrombin time	PT	10000	6967	0	1	-0.000278	(-0.021 - 0.021)		1016	503	0.0421	1.0032	0.042157	(-0.019 - 0.104)		964	820	0.0985	1.0095	0.097994	(0.033 - 0.163)		0.00375357	0.201366	0.135214
46	quantitative	Blood Coagulation etc.	Fibrinogen	Fbg	10000	6967	0	1	0.006708	(-0.014 - 0.028)		1016	503	0.0006	0.9321	0.000459	(-0.061 - 0.062)		964	820	0.0201	1.0102	0.032062	(-0.032 - 0.096)		0.451877	0.849879	0.58267
47	quantitative	Blood Coagulation etc.	Creatine kinase	CK	10000	6967	0	1	-0.011476	(-0.033 - 0.010)		1016	503	0.022	0.9929	0.022295	(-0.039 - 0.084)		964	820	-0.0751	1.0062	-0.09551	(-0.16 - -0.031)		0.0130617	0.308506	0.000424687
48	quantitative	Blood Coagulation etc.	Lactate dehydrogenase	LDH	10000	6967	0	1	-0.004175	(-0.025 - 0.017)		1016	503	-0.0294	0.9963	-0.02931	(-0.091 - 0.032)		964	820	-0.0201	0.9758	-0.027532	(-0.092 - 0.037)		0.489416	0.447663	0.906103
49	quantitative	Blood Coagulation etc.	C-reactive protein	CRP	10000	6967	0	1	-0.00074	(-0.022 - 0.021)		1016	503	-0.042	1.0078	-0.042001	(-0.104 - 0.020)		964	820	-0.2374	1.1478	-0.238755	(-0.304 - -0.173)		>0.0001	0.219727	0.000796153
50	quantitative	Blood cells	White blood cell count	WBC	10000	6967	0	1	0.005793	(-0.015 - 0.027)		1016	503	-0.0588	1.0418	-0.058979	(-0.121 - 0.003)		964	820	0.0062	1.0393	0.016529	(-0.049 - 0.082)		0.752841	0.0524885	0.180646
51	quantitative	Blood cells	Neutrophil count	Neutro	10000	6967	0	1	0.006368	(-0.015 - 0.027)		1016	503	-0.0515	0.9946	-0.051706	(-0.113 - 0.010)		964	820	-0.0377	1.0084	-0.026328	(-0.091 - 0.038)		0.334403	0.0801004	0.498284
52	quantitative	Blood cells	Eosinophil count	Eosino	10000	6967	0	1	0.003333	(-0.018 - 0.025)		1016	503	0.088	1.0213	0.087903	(0.026 - 0.150)		964	820	0.018	1.0381	0.023978	(-0.041 - 0.089)		0.544121	0.0112043	0.231188
53	quantitative	Blood cells	Basophil count	Baso	10000	6967	0	1	-0.000791	(-0.022 - 0.020)		1016	503	0.1525	1.0245	0.152491	(0.091 - 0.214)		964	820	0.2605	0.9814	0.259135	(0.194 - 0.324)		>0.0001	>0.0001	0.0146526
54	quantitative	Blood cells	Monocyte count	Mono	10000	6967	0	1	0.003506	(-0.018 - 0.025)		1016	503	-0.0931	0.9853	-0.093234	(-0.155 - -0.032)		964	820	-0.0593	1.0075	-0.053041	(-0.118 - 0.012)		0.0947862	0.00353079	0.345442
55	quantitative	Blood cells	Lymphocyte count	Lym	10000	6967	0	1	-0.002194	(-0.023 - 0.019)		1016	503	-0.0413	0.9881	-0.04121	(-0.103 - 0.020)		964	820	-0.0744	1.0108	-0.078334	(-0.143 - -0.014)		0.0245585	0.23954	0.212354
56	quantitative	Blood cells	Red blood cell count	RBC	10000	6967	0	1	0.006404	(-0.015 - 0.027)		1016	503	0.038	0.9875	0.037844	(-0.024 - 0.099)		964	820	0.0212	1.0025	0.032609	(-0.032 - 0.097)		0.438631	0.342844	0.932238
57	quantitative	Blood cells	Hemoglobin	Hb	10000	6967	0	1	0.000856	(-0.020 - 0.022)		1016	503	0.0136	1.0114	0.013578	(-0.048 - 0.075)		964	820	0.025	0.9886	0.026485	(-0.038 - 0.091)		0.449246	0.701395	0.717165
58	quantitative	Blood cells	Hematocrit	Ht	10000	6967	0	1	-0.001462	(-0.022 - 0.020)		1016	503	0.0343	0.9828	0.034363	(-0.027 - 0.096)		964	820	0.0368	0.9852	0.034147	(-0.030 - 0.099)		0.291808	0.278968	0.995137
59	quantitative	Blood cells	Mean corpuscular volume	MCV	10000	6967	0	1	-0.007023	(-0.028 - 0.014)		1016	503	-0.0546	1.0035	-0.054408	(-0.116 - 0.007)		964	820	-0.0425	1.0496	-0.05506	(-0.120 - 0.010)		0.15785	0.154982	0.668026
60	quantitative	Blood cells	Mean corpuscular hemoglobin	MCH	10000	6967	0	1	-0.010025	(-0.031 - 0.011)		1016	503	-0.0821	0.9782	-0.081882	(-0.143 - -0.020)		964	820	-0.0356	1.0111	-0.053498	(-0.118 - 0.011)		0.198749	0.030139	0.907862
61	quantitative	Blood cells	Mean corpuscular hemoglobin concentration	MCMC	10000	6967	0	1	-0.008772	(-0.030 - 0.012)		1016	503	-0.098	0.9561	-0.097802	(-0.159 - -0.036)		964	820	-0.0736	1.0299	-0.089202	(-0.154 - -0.025)		0.0174105	0.00721314	0.975581
62	quantitative	Blood cells	Platelet count	Plt	10000	6967	0	1	0.000571	(-0.021 - 0.022)		1016	503	0.004	1.0063	0.003987	(-0.058 - 0.066)		964	820	0.0466	1.0319	0.047585	(-0.017 - 0.112)		0.166424	0.918237	0.306959
63	Aging		Centenarian PGS	Cent.PGS	10000	6967	0	1	0.008687	(--0.013 - 0.031)		1016	503	0.2923	1.0195	0.292073	(0.228 - 0.356)		964	820	3.4125	1.3628	3.42801	(3.361 - 3.495)		>0.0001	>0.0001	>0.0001
