# Supplementary material for: Association of centenarian polygenic score with disability-free survival and its modification effects on aging outcomes
Source: Research Square preprint supplement (doi:10.21203/rs.3.rs-6869504/v1), 2025-06-26

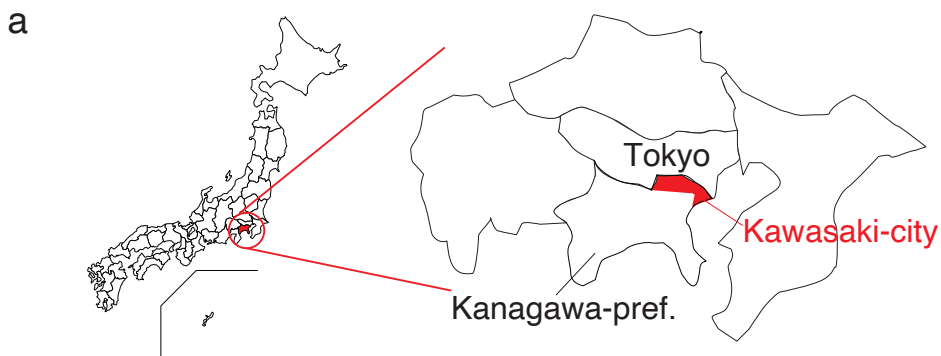

b

Screening with the basic registration and the long-term care insurance data;  
 1) a resident of Kawasaki city and aged between 85-89 years at baseline  
 2) no need for long-term care or requiring support level 1.  
 n=12,906 (March 2017)

Invitation letter sent  
 n=9,976 (Men: 3,962, Women: 6,014)

Expression of participation  
 n=1,464 (Men: 701, Women: 763)

438  
 excluded

not meeting inclusion criteria; 16  
 unable to telephone contact; 83  
 acute illness; 99  
 declined after telephone instruction; 139  
 unable to consent; 68  
 family circumstances; 21  
 unknown: 12

Enrolled and examined at the study site  
 during Mar 2017 and Dec 2018  
 n=1,026 (Men: 513, Women: 513)

c

### Japan's long-term care system

| Level           | ADL condition                                                                                                    |
|-----------------|------------------------------------------------------------------------------------------------------------------|
| Support level 1 | LTC is needed for some aspects of daily living, but proper care can improve or maintain ADL                      |
| Support level 2 |                                                                                                                  |
| LTC level1      | Unstable in rising and gait; partial support needed in toileting, bathing, etc. <b>Boundary of Independency</b>  |
| LTC level 2     | Difficulty in rising and gait; partial or complete support needed in toileting, bathing, etc.                    |
| LTC level 3     | Impossible to rise and no gait. Complete support needed in toileting, bathing, dressing, and all other basic ADL |
| LTC level 4     | Severe decline in ADL capacity; complete support needed in toileting, bathing, dressing, and all other basic ADL |
| LTC level 5     | Complete support in all ADL; difficulty with communication                                                       |

ADL: activities of daily living, LTC: long-term care

d

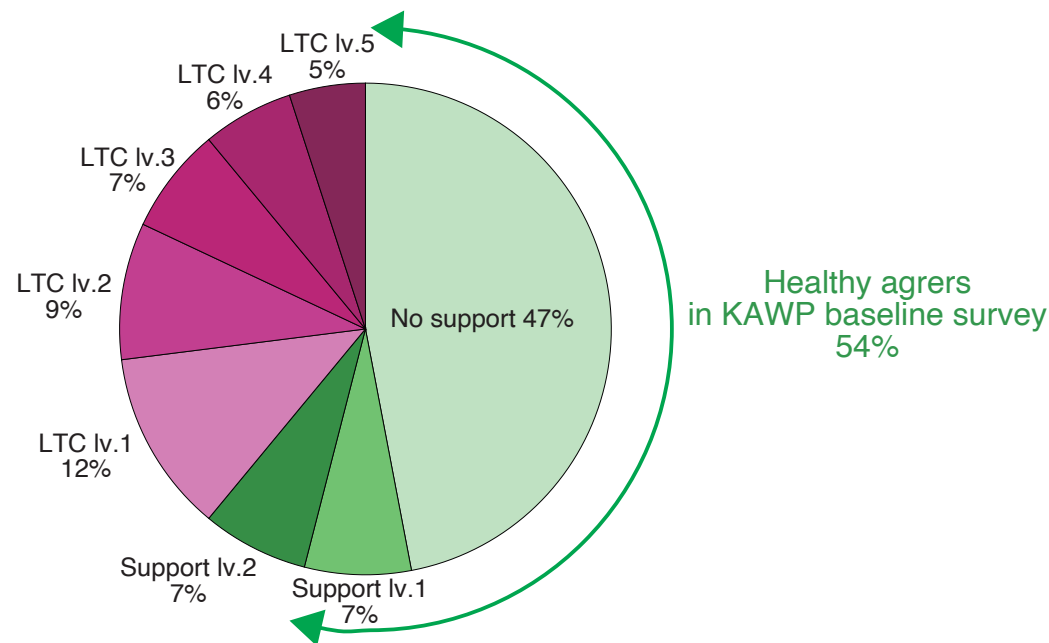

Supplement: Supplementary file 2 [file 0cfcbe33840ebec9f4afb6d8.pdf]
