# Supplementary material for: Association of centenarian polygenic score with disability-free survival and its modification effects on aging outcomes
Source: Research Square preprint supplement (doi:10.21203/rs.3.rs-6869504/v1), 2025-06-26
Supplement: Supplementary file 2 [file 5c0ddf83491b4269ec099c8b.xlsx]

## Sheet: Supplementary Table 3
				Supplementary Table 3 | Lead SNVs identified via Japanese centenarian GWAS
				Lead SNVs (P < 5E-8)								Cent.	GTEx (V8)				Enformer
				rsID	Chr:Pos	Gene		REF	ALT	Z	P	MAF	eQTLs	sQTLs	ieQTLs	isQTLs	max_abs_PC in SNV	max of max_abs_PC in gene
				rs429358	19:45411941	APOE	p.C130R	T	C	-6.22	4.881e-10	0.0477178	3 genes	2 genes	-	-	13.121	46.191
				rs75571981	6:64620890	EYS	intron	T	C	5.52	3.48e-08	0.064834	no data	no data	no data	no data	4.778	28.771
				Lead SNVs (5E-8 ≤ P < 5E-6)								Cent.	GTEx (V8)				Enformer
				rsID	Chr:Pos	Gene		REF	ALT	Z	P	MAF	eQTLs	sQTLs	ieQTLs	isQTLs	max_abs_PC in SNV	max of max_abs_PC in gene
				rs73116078	3:7645538	GRM7	intron	G	A	-5.24	1.59e-07	0.240664	-	-	-	-	0.581	12.568
				rs7412	19:45412079	APOE	p.R176C	C	T	5.18	2.21e-07	0.0720954	1 gene	-	-	-	20.322	46.191
				rs35003102	1:64576889	ROR1	intron	A	G	4.68035	2.86388e-06	0.0471992	-	-	-	-	1.756	9.516
				rs9878023	3:164775491	SI	intron	A	C	-4.99811	5.78941e-07	0.786164	no data	no data	no data	no data
				rs149816224	4:137968434	LINC02511	intron	C	A	4.71509	2.41606e-06	0.0449735	no data	no data	no data	no data
				rs9638833	7:26316172	SNX10	upstream of exon1	T	C	4.68631	2.7818e-06	0.362409	2 genes	-	-	-	13.036	99.914
				rs62449078	7:30880152	MINDY4	intron	A	C	-4.64197	3.45106e-06	0.173777	2 genes	2 genes	-	-
				rs183122984	9:15595023	CCDC171	intron	A	G	4.62227	3.7956e-06	0.0260146	no data	no data	no data	no data
				rs75295329	12:111344621	CCDC63	intron	G	T	4.66877	3.0301e-06	0.19613	-	-	-	-
				rs35690044	13:39603385	PROSER1	intron	A	G	-4.66068	3.1516e-06	0.126333	no data	no data	no data	no data
				rs1950744	14:52646412	NID2-PTGDR	intergene	C	G	4.88989	1.00892e-06	0.780729	2 genes	-	-	-
				rs117714605	14:89717779	FOXN3	intron	A	C	4.98962	6.0497e-07	0.0311526	no data	no data	no data	no data
				rs369599	19:45379336	NECTIN2	intergenic	C	T	-4.5196	6.193e-06	0.739356	2 genes	-	-	-	32.593	32.593
