# Supplementary material for: Association of centenarian polygenic score with disability-free survival and its modification effects on aging outcomes
Source: Research Square preprint supplement (doi:10.21203/rs.3.rs-6869504/v1), 2025-06-26
Supplement: Supplementary file 3 [file 5da39d8612b406f7c61e9fcd.xlsx]

## Sheet: Supplementary Table 5
		Supplementary Table 5 | Characteristics of participants with favorable and unfavorable measurable phenotypes
				Favorable phenotypes				Unfavorable phenotypes
			phenotype	Score	n	median (IQR)		Score	n	median (IQR)
		Measurements
		Function	MMSE (30-point scale)	≥ 24	850	27 (25 - 29)		< 24	170	22 (21 - 23)
			RFI frail (0-1 scale)	<0.15	289	0.118 (0.99 - 0.135)		≥0.25	199	0.283 (0.263 - 0.314)
			GDS (15-point scale)	<5	746	2 (1 - 3)		≥5	276	6 (5 - 8)
			TUG (sec)	< 12	668	10.1 (9.15 - 10.9)		≥12	343	13.6 (12.7 - 15.9)
			BMI (kg/m2)	≥ 18.5	963	23.3 (21.6 - 25.3)		< 18.5	63	17.5 (17.0 - 17.9)
			GRIP male (kg)	≥ 28 (M)	237	30.8 (29.4 - 33.0)		< 28 (M)	270	24.4 (21.8 - 26.3)
			GRIP female (kg)	≥18 (F)	261	20.02 (19.0 - 21.8)		<18 (F)	244	15.8 (14.3 - 17.0)
			RFI prefrail (0-1 scale)	≥0.15, < 0.25	289	0.118 (0.099 - 0.135)		<0.15	533	0.196 (0.171 - 0.217)
		Biomarkers	IL6 (pg/mL)	< 5	883	2.21 (1.60 - 2.92)		≥5	137	7.34 (5.76 - 13.8)
			GDF15 (pg/mL)	< 2000	785	1411 (1167 - 1658)		≥ 2000	236	2421 (2179 - 2762)
			HbA1c (%)	< 6.5	868	5.8 (5.6 - 6.0)		≥ 6.5	154	7.0 (6.7 - 7.4)
			NTproBNP (pg/mL)	< 200	633	101 (68 - 139)		≥ 200	367	336 (246 - 619)
			HDLC (mg/dL)	≥ 40	934	61 (52. - 73)		< 40	88	37 (33.8. - 38.2)
			ALB (g/dL)	≥ 4	799	4.2 (4.1 - 4.4)		< 4	223	3.8 (3.7 - 3.9)
			eGFRcys (mL/min/1.73m²)	≥ 50	700	62.1 (55.8 - 69.2)		< 50	300	42.4 (36.7 - 46.5)
			BMI (kg/m²)	≥ 18.5	963	23.3 (21.6-25.3)		< 18.5	63	17.5 (17.0 - 17.9)
			LDLC (mg/dL)	≤ 140	878	105 (88 - 122)		> 140	144	152 (146 - 162)
		Abbreviation: IQR: interquartile range, MMSE: A mini-mental state examination, RFI: Rockwood Frailty Index, TUG: Time up and GO,
		GDS: geriatric depression scale, BMI: body mass index, IL6: Interleukin-6, GDF15: growth differentiation factor 15, HbA1c:
		NTproBNP: N-terminal pro brain natriuretic peptide, HDLC: high-density lipoprotein cholesterol, ALB: Albumin
		eGFRcys: estimated Glomerular Filtration Rate based on cystatin C (eGFRcys), BMP: Body Mass Index,
		LDLC: low-density lipoprotein cholesterol,
