# Supplementary material for: Association of centenarian polygenic score with disability-free survival and its modification effects on aging outcomes
Source: Research Square preprint supplement (doi:10.21203/rs.3.rs-6869504/v1), 2025-06-26
Supplement: Supplementary file 4 [file 666b50bae53376e398540c45.xlsx]

## Sheet: Supplementary Table 6
		Supplementary Table 6 | Characteristics of participants with favorable and unfavorable binary questionnaire phenotypes
				Favorable phenotypes				Unfavorable phenotypes
			phenotype	Response	n	female %		Response	n	median (IQR)
		Binary questionnare
		Function	Economic hardership	no	600	(49.7%)		yes	192	(48.4%)
			Drinking experience	no	452	(73.2%)		yes	573	(31.9%)
			Smoking experience	no	595	(79.0%)		yes	428	(9.3%)
			Education (< 12 years)	no	305	(27.9%)		yes	721	(59.4%)
		Disease	Diabetes mellitus	no	872	(51.1%)		yes	139	(41.0%)
			Fracture	no	716	(44.1%)		yes	306	(63.4%)
			High blood pressure	no	366	(50.8%)		yes	657	(50.8%)
			Cardiovascular dissease	no	754	(53.4%)		yes	266	(39.5%)
