# Supplementary material for: Association of centenarian polygenic score with disability-free survival and its modification effects on aging outcomes
Source: Research Square preprint supplement (doi:10.21203/rs.3.rs-6869504/v1), 2025-06-26
Supplement: Supplementary file 5 [file ac96b1c278f43142cafc499e.xlsx]

## Sheet: Supplementary Table 2
				Supplementary Table 2 | Lead SNV list for Japanese centenarian GWAS
										meta GWAS analysis									WGS GWAS analysis											DNA microarray GWAS analysis											ToMMo 38KJPN
				Lead SNVs (P < 5E-7)								Cent.			Cont.				Cent. WGS 524				Cont. WGS 3340				WGS GWAS			Cent. DNA array 440				Cont. DNA array 3966				DNA array GWAS
				rsID	Chr:Pos	Gene		REF	ALT	Z	P	MAF	N (ALT)	N (Total)	MAF	N (ALT)	N (Total)		MAF	N (ALT)	N (Total)		MAF	N (ALT)	N (Total)		OR	P		MAF	N (ALT)	N (Total)		MAF	N (ALT)	N (Total)		OR	P		MAF	N (ALT)	N (Total)
				rs429358	19:45411941	APOE	p.C130R	T	C	-6.22	4.881e-10	0.0477178	92	1928	0.0997393	1454	14578		0.0372137	39	1048		0.0980539	655	6680		0.3555	1.505e-10		0.0602273	53	880		0.101165	799	7898		0.5694	9.979e-05		0.103704	8030	77432
				rs75571981	6:64620890	EYS	intron	T	C	5.52	3.48e-08	0.064834	125	1928	0.053723	785	14612		0.0629771	66	1048		0.0553892	370	6680		1.146	0.3223		0.0670455	59	880		0.0523197	415	7932		1.302	0.0662		0.054475	4216	77394
				Lead SNVs (5E-7 ≤ P < 5E-6)								Cent.			Cont.				Cent. WGS 524				Cont. WGS 3340				WGS GWAS			Cent. DNA array 440				Cont. DNA array 3966				DNA array GWAS
				rsID	Chr:Pos	Gene		REF	ALT	Z	P	MAF	N (ALT)	N (Total)	MAF	N (ALT)	N (Total)		MAF	N (ALT)	N (Total)		MAF	N (ALT)	N (Total)		OR	P		MAF	N (ALT)	N (Total)		MAF	N (ALT)	N (Total)		OR	P		MAF	N (ALT)	N (Total)
				rs73116078	3:7645538	GRM7	intron	G	A	-5.24	1.59e-07	0.240664	464	1928	0.293699	4288	14600		0.251908	264	1048		0.29012	1938	6680		0.8239	0.01084		0.227273	200	880		0.296717	2350	7920		0.6971	1.648e-05		0.291375	22532	77330
				rs7412	19:45412079	APOE	p.R176C	C	T	5.18	2.21e-07	0.0720954	139	1928	0.0414043	605	14612		0.0782443	82	1048		0.0438623	293	6680		1.85	1.465e-06		0.0647727	57	880		0.0393343	312	7932		1.692	0.0003511		0.043871	3397	77432
				rs35003102	1:64576889	ROR1	intron	A	G	4.68035	2.86388e-06	0.0471992	91	1928	0.0297179	434	14604		0.0438931	46	1048		0.0317365	212	6680		1.401	0.04167		0.0511364	45	880		0.0280162	222	7924		1.87	0.000148		0.032152	2490	77444
				rs9878023	3:164775491	SNX10	intron	A	C	-4.99811	5.78941e-07	0.786164	1500	1908	0.842091	12084	14350		0.772467	808	1046		0.840821	5615	6678		0.6427	3.964e-08		0.802784	692	862		0.843196	6469	7672		0.757	0.0022		0.841574	65153	77418
				rs149816224	4:137968434	LINC02511	intron	C	A	4.71509	2.41606e-06	0.0449735	85	1890	0.0279512	403	14418		0.0477099	50	1048		0.0306886	205	6680		1.582	0.004131		0.0415677	35	842		0.025588	198	7738		1.652	0.006745		0.031408	2425	77210
				rs9638833	7:26316172	SNX10	upstream of exon1	T	C	4.68631	2.7818e-06	0.362409	698	1926	0.314734	4597	14606		0.368321	386	1048		0.318862	2130	6680		1.246	0.001489		0.355353	312	878		0.311254	2467	7926		1.22	0.00764		0.317326	24575	77444
				rs62449078	7:30880152	MINDY4	intron	A	C	-4.64197	3.45106e-06	0.173777	334	1922	0.230158	3358	14590		0.166985	175	1048		0.234281	1565	6680		0.6552	1.239e-06		0.181922	159	874		0.226675	1793	7910		0.7587	0.002528		0.220843	17103	77444
				rs183122984	9:15595023	CCDC171	intron	A	G	4.62227	3.7956e-06	0.0260146	50	1922	0.0116822	170	14552		0.0257634	27	1048		0.0140719	94	6680		1.853	0.00459		0.0263158	23	874		0.00965447	76	7872		2.772	9.992e-06		0.013975	1082	77426
				rs75295329	12:111344621	CCDC63	intron	G	T	4.66877	3.0301e-06	0.19613	375	1912	0.135118	1953	14454		0.205153	215	1048		0.137575	919	6680		1.618	9.024e-09		0.185185	160	864		0.133007	1034	7774		1.481	2.49e-05		0.143433	11108	77444
				rs35690044	13:39603385	PROSER1	intron	A	G	-4.66068	3.1516e-06	0.126333	237	1876	0.167976	2394	14252		0.108863	113	1038		0.173392	1143	6592		0.5824	1.878e-07		0.147971	124	838		0.163316	1251	7660		0.8897	0.2521		0.174838	13522	77340
				rs1950744	14:52646412	NID2-PTGDR	intergene	C	G	4.88989	1.00892e-06	0.780729	1499	1920	0.736245	10705	14540		0.781489	819	1048		0.741317	4952	6680		1.248	0.00543		0.779817	680	872		0.731934	5753	7860		1.297	0.002319		0.735125	56931	77444
				rs117714605	14:89717779	FOXN3	intron	A	C	4.98962	6.0497e-07	0.0311526	60	1926	0.0157021	229	14584		0.028626	30	1048		0.0167665	112	6680		1.728	0.007866		0.0341686	30	878		0.0148026	117	7904		2.355	2.201e-05		0.01698	1315	77444
				rs369599	19:45379336	NECTIN2	intergenic	C	T	-4.5196	6.193e-06	0.739356	1424	1926	0.789355	11523	14598		0.73187	767	1048		0.786677	5255	6680		0.7402	6.974e-05		0.748292	657	878		0.791614	6268	7918		0.7826	0.002918		0.785956	60866	77442
