# Supplementary material for: Association of centenarian polygenic score with disability-free survival and its modification effects on aging outcomes
Source: Research Square preprint supplement (doi:10.21203/rs.3.rs-6869504/v1), 2025-06-26
Supplement: Supplementary file 6 [file ae82a56109c5fb93aa91a7e1.xlsx]

## Sheet: Supplementary Table 1
				Supplementary Table 1. Participants' characteristics at enrollment
					Japanese centenarians (GWAS)				Japanese centenarians (rep.)				Healthy agers				Contorls (GWAS)				Contorls (PRS)
					N				N				N				N				N
				No of women, no (%)	964	820	(85.1)		60	42	(70.0)		1016	503	(49.5)		7306	4728	(64.7)		10000	6188	(61.9)
				Age at enrollment (years old), median (IQR)1	964	106	(103.9 - 107.1)		58	100.6	(100.3 - 100.9)		1016	86.842	(85.9 - 88.2)		7306	45	(32-63)		10000	36	(30-58)
				No of death, no (%)	944	915	(96.9)		-	-	-		1016	280	(27.6)		-	-	-		-	-	-
				Age at death (years old), median (IQR)1	915	107.5	(105.7 - 109.2)		-	-	-		280	91.2	(89.9 - 92.6)		-	-	-		-	-	-
				No of end of disability-free survival, no (%)	-	-	-		-	-	-		1016	494	(48.6)		-	-	-		-	-	-
				Age at end of disability-free survival (years old), median (IQR)1	-	-	-		-	-	-		494	92.3	(90.8 - 93.7)		-	-	-		-	-	-
				Survival days who are died (days), median (IQR)1	915	520	(219 - 1024)		-	-	-		168	1155	(714 - 1394)		-	-	-		-	-	-
				Survival days who are alive (days), median (IQR)1	29	881	(505 - 1352)		-	-	-		825	1580	(1455 - 1784)		-	-	-		-	-	-
				1IQR: interquartile range
