# Supplementary figures and images for: Association of centenarian polygenic score with disability-free survival and its modification effects on aging outcomes
Source: Research Square preprint supplement (doi:10.21203/rs.3.rs-6869504/v1), 2025-06-26

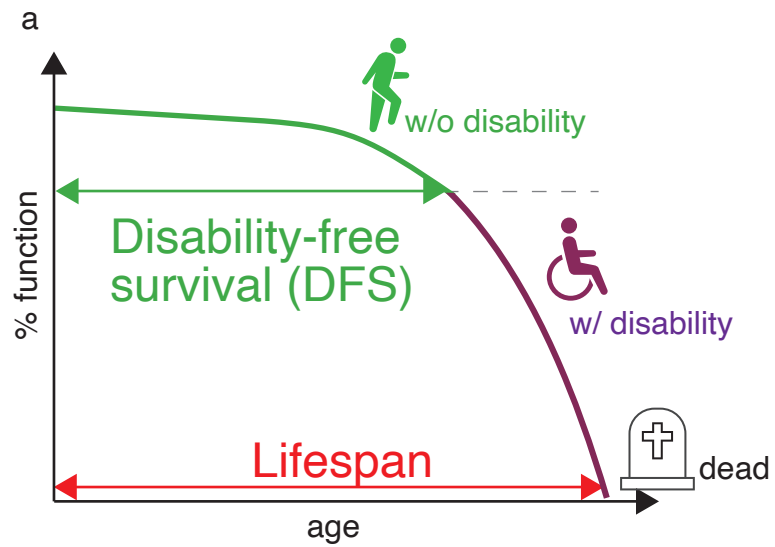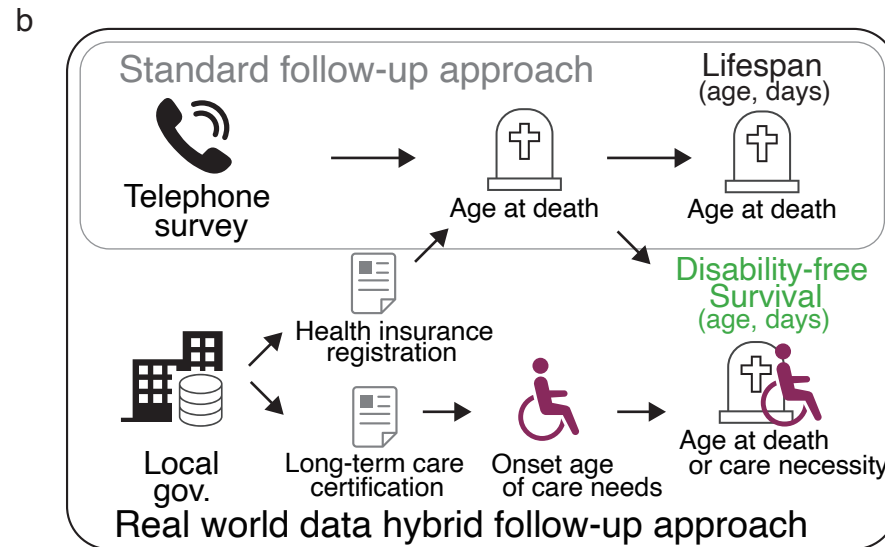

Supplement: Supplementary file 3 [file 9b05063512590f61249e2c20.pdf]
